# Supplementary material for: Synthesis, characterization, crystal structure, cytotoxicity, apoptosis and cell cycle arrest of ruthenium(ii) complex [Ru(bpy)2(adpa)](PF6)2 (bpy = 2,2′-bipyridine, adpa = 4-(4-aminophenyl)diazenyl-N-(pyridin-2-ylmethylene)aniline)
Source: Royal Society of Chemistry journal article supplement (doi:10.1039/c4ra12715c), 2015-01-01
Supplement: c4ra12715c1.pdf [file c4ra12715c1.pdf]

**Synthesis, Characterization, Crystal structure, Cytotoxicity,  
Apoptosis and Cell Cycle Arrest of Ruthenium(II) Complex  
[Ru(bpy)<sub>2</sub>(adpa)](PF<sub>6</sub>)<sub>2</sub>(bpy=2,2'-bipyridine, adpa = 4-(4-  
aminophenyl)diazenyl-N-(pyridin-2-ylmethylene)aniline)**

Supporting Information

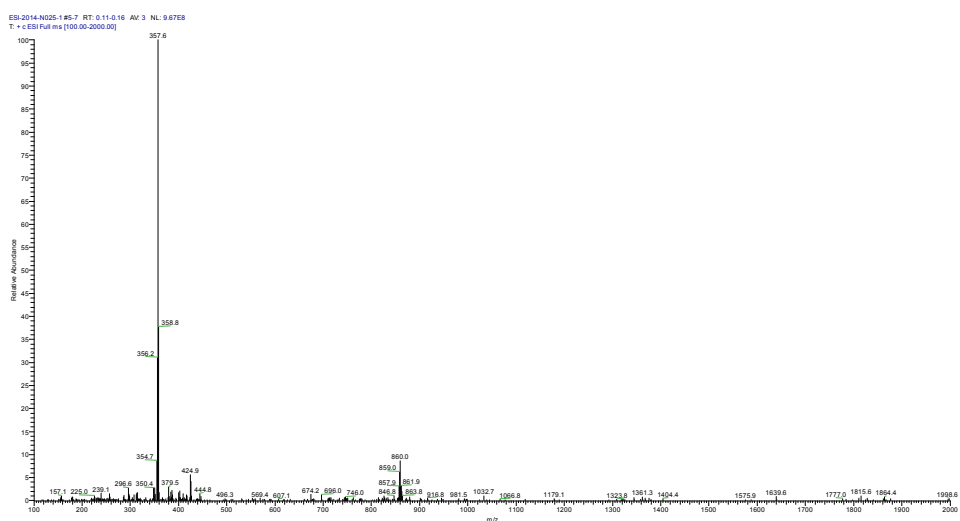

(a)

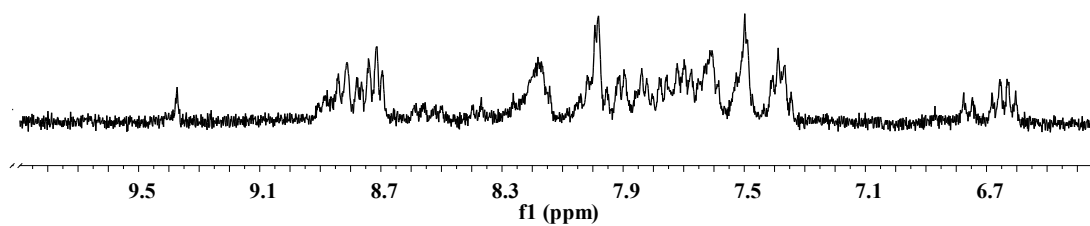

(b)

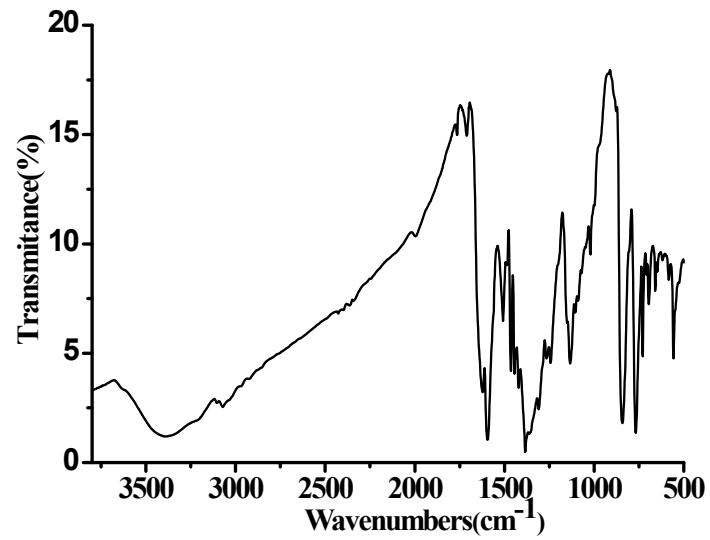

(c)

Fig.S1 (a) ESI-MS of the **Ru-adpa** in DMSO; (b) <sup>1</sup>H NMR of **Ru-adpa** in *d*<sub>6</sub>-DMSO; (c) IR of **Ru-adpa**

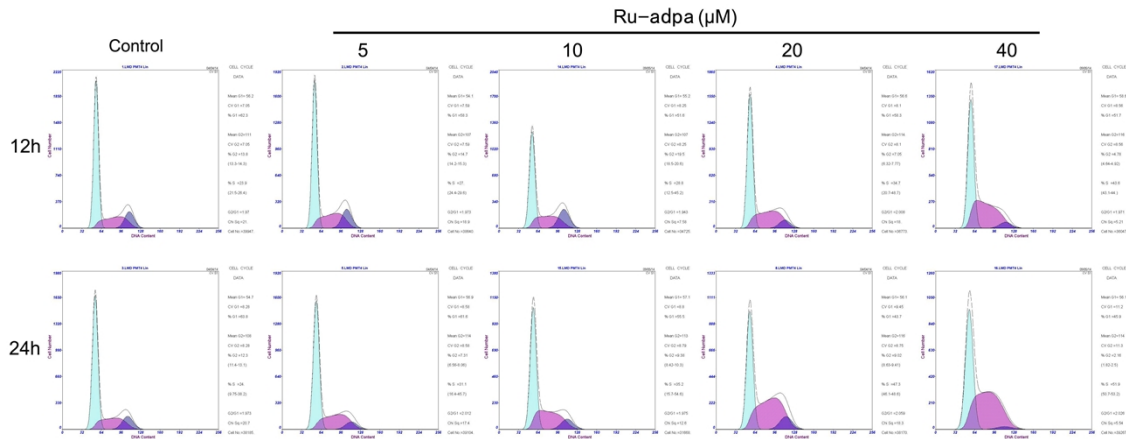

Fig.S2 Cell cycle distribution on exposure of AGS cells to 5、10、20、40  $\mu$ M **Ru-adpa**
